# Supplementary material
Source: PubMed Central journal article supplement (PMC4027946)
Supplement: cb5000532_si_001.pdf [file cb5000532_si_001.pdf]

# Supporting Information

## **Expanded Cellular Amino Acid Pools Containing Phosphoserine, Phosphothreonine, and Phosphotyrosine**

Justin B. Steinfeld<sup>¶,3</sup>, Hans R. Aerni<sup>¶,1,2</sup>, Svetlana Rogulina<sup>1,2</sup>, Yuchen Liu<sup>3</sup>, and Jesse Rinehart<sup>\*1,2</sup>

*Department of <sup>1</sup>Cellular & Molecular Physiology, <sup>2</sup>Systems Biology Institute, and <sup>3</sup>Molecular Biophysics & Biochemistry, Yale University, New Haven, CT 06520.*

<sup>¶</sup>These authors contributed equally to this work.

<sup>\*</sup>To whom correspondence should be addressed, [jesse.rinehart@yale.edu](mailto:jesse.rinehart@yale.edu)

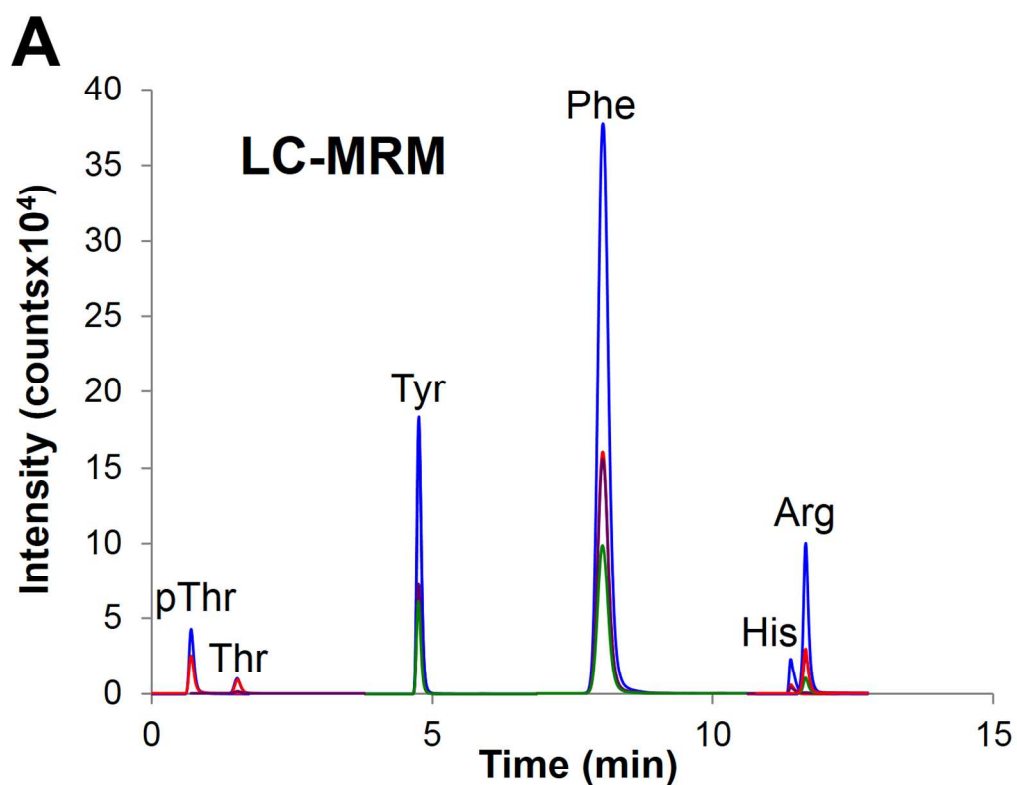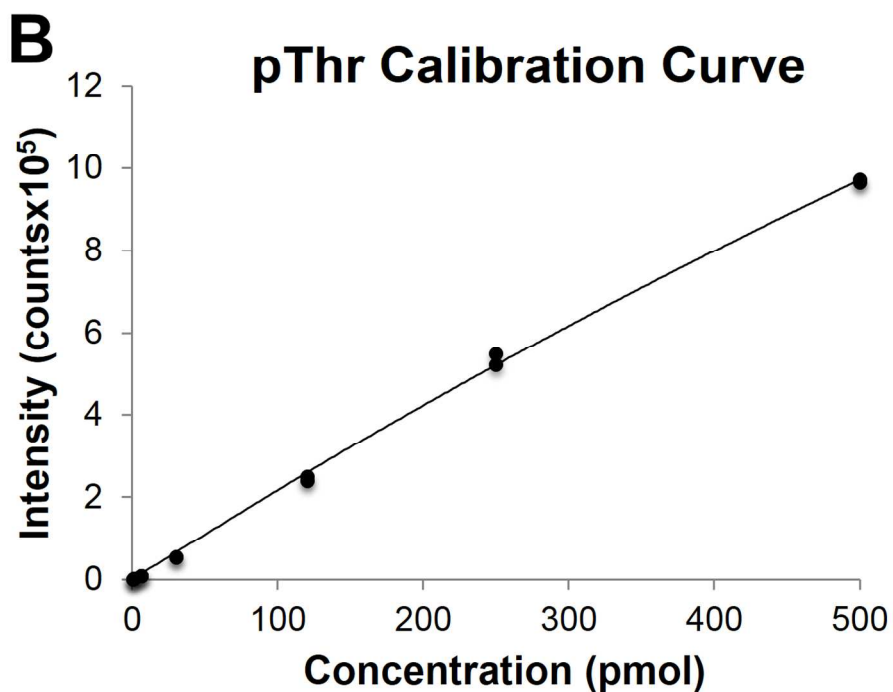

**Supplemental Figure 1. LC-MS/MS analysis of pThr.**

**A)** A typical chromatogram of an LC-MS/MS run is shown. Unique MRM transitions are plotted for the amino acids indicated above the individual peaks. **B)** A representative calibration curve for pThr is shown. The fitted calibration function for this curve was  $y = -1.596345x^2 + 3797.168958x - 862.935161$  and the maximum % residual was 8.7.

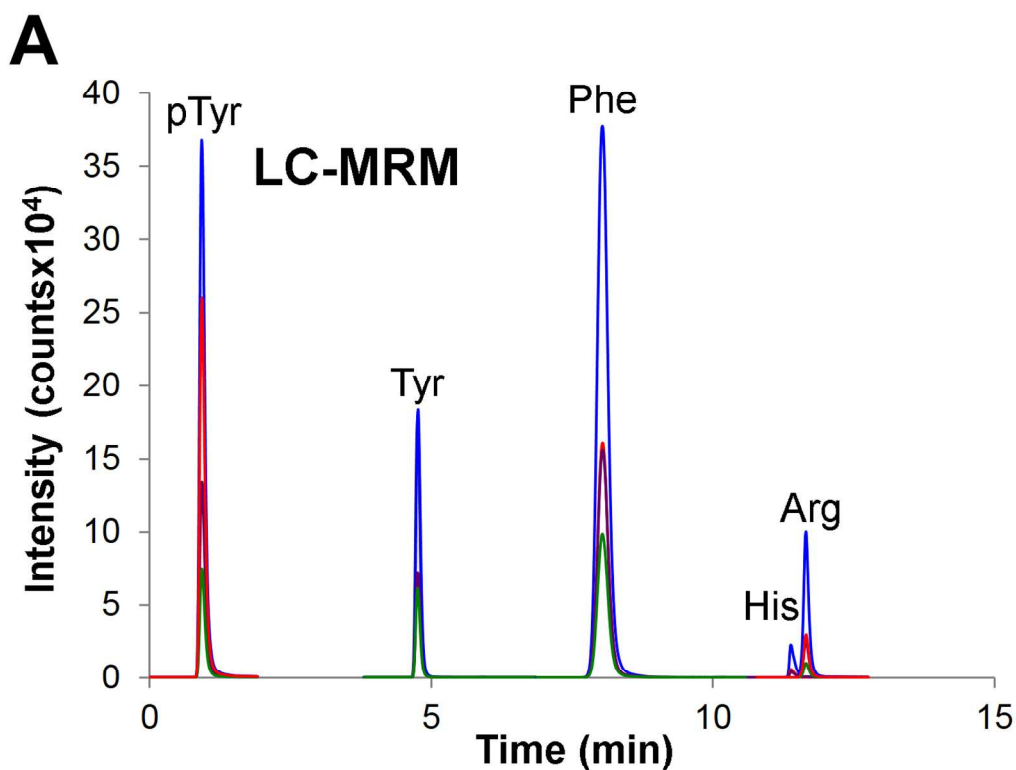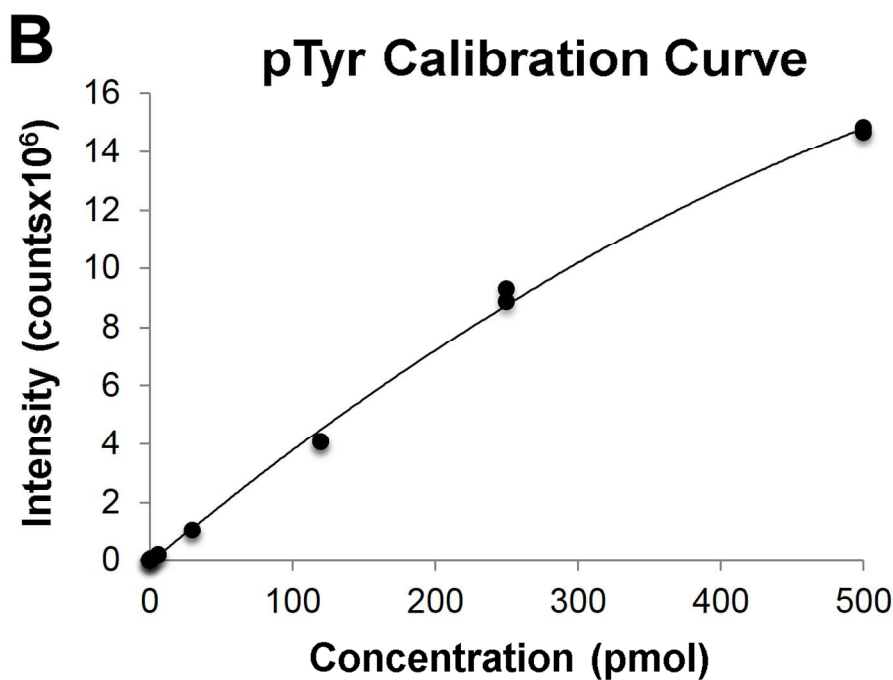

**Supplemental Figure 2. LC-MS/MS analysis of pTyr.**

**A)** A typical chromatogram of an LC-MS/MS run is shown. Unique MRM transitions are plotted for the amino acids indicated above the individual peaks. **B)** A representative calibration curve for pTyr is shown. The fitted calibration function for this curve was  $y = -17.446301x^2 + 34286.990110x - 2974.004316$  and the maximum % residual was 4.4.

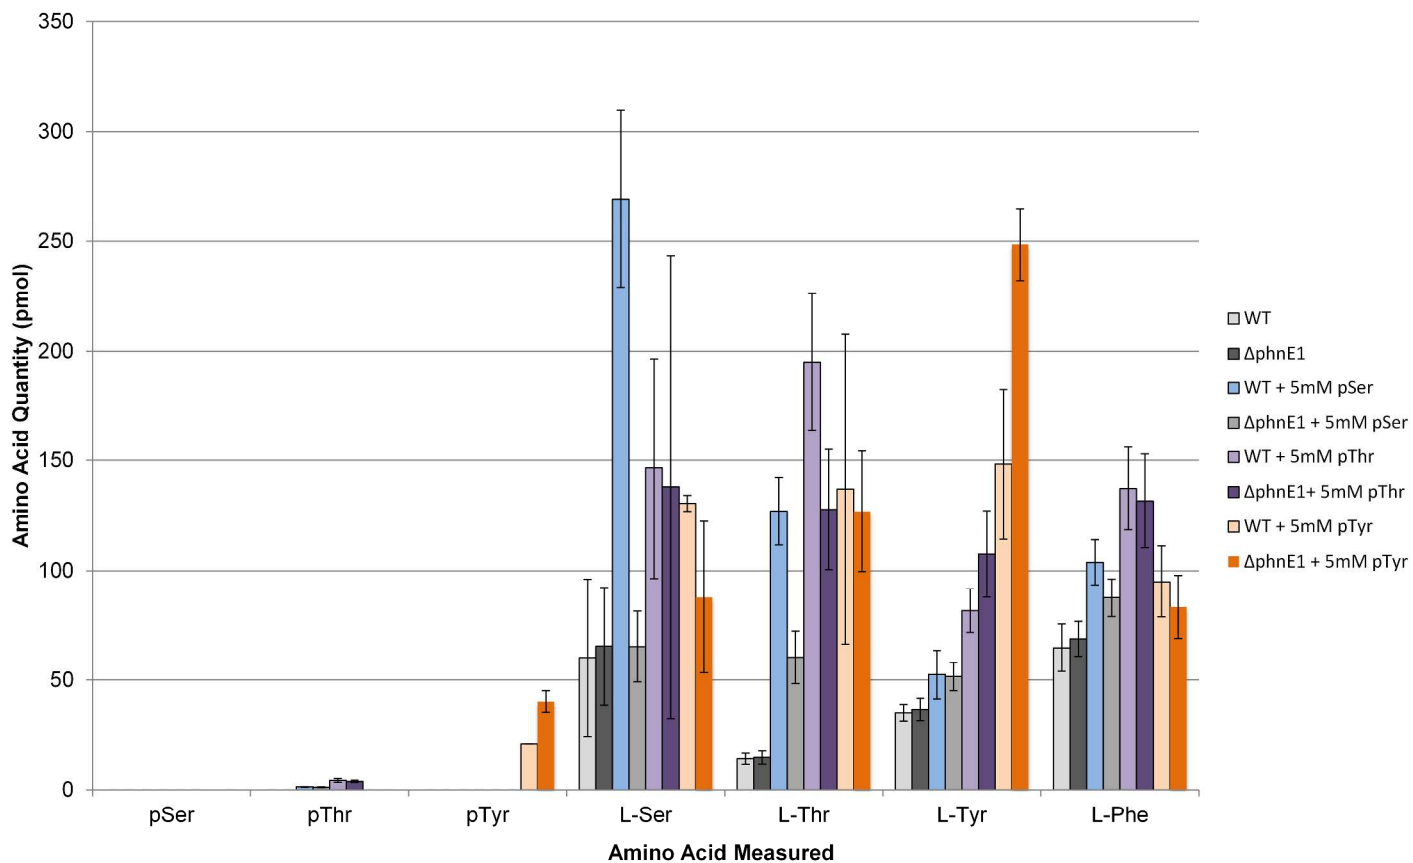

**Supplemental Figure 3. Quantitation of intracellular amino acids in a  $\Delta$ phnE1 *E. coli* strain.**

Measured amino acid quantities of select amino acids in K12 BW25113 WT vs.  $\Delta$ phnE1 *E. coli* grown in LPM media (light grey vs. dark grey), in LPM media with 5mM pSer (light blue vs. grey), in LPM with 5mM pThr (light violet vs. dark violet), and LPM media with 5mM pTyr (light orange vs. dark orange). Error bars were calculated using the 95% confidence interval, n=5.

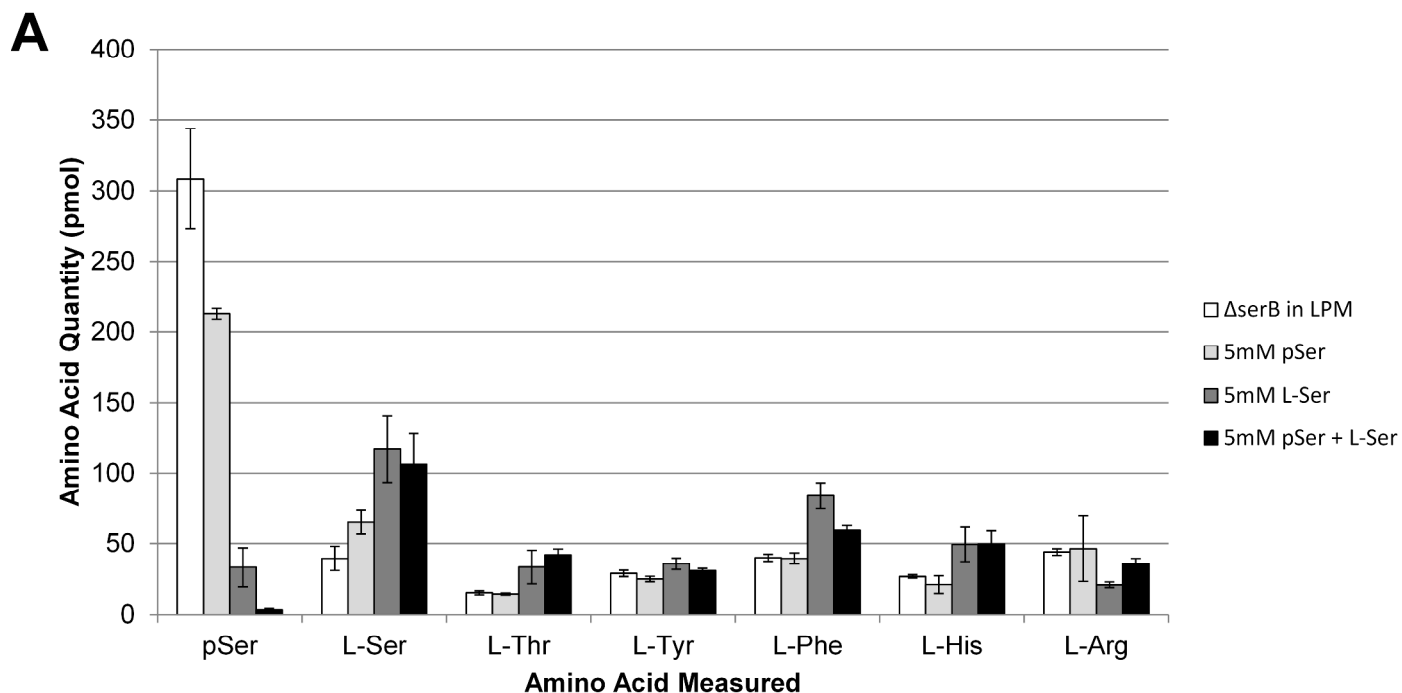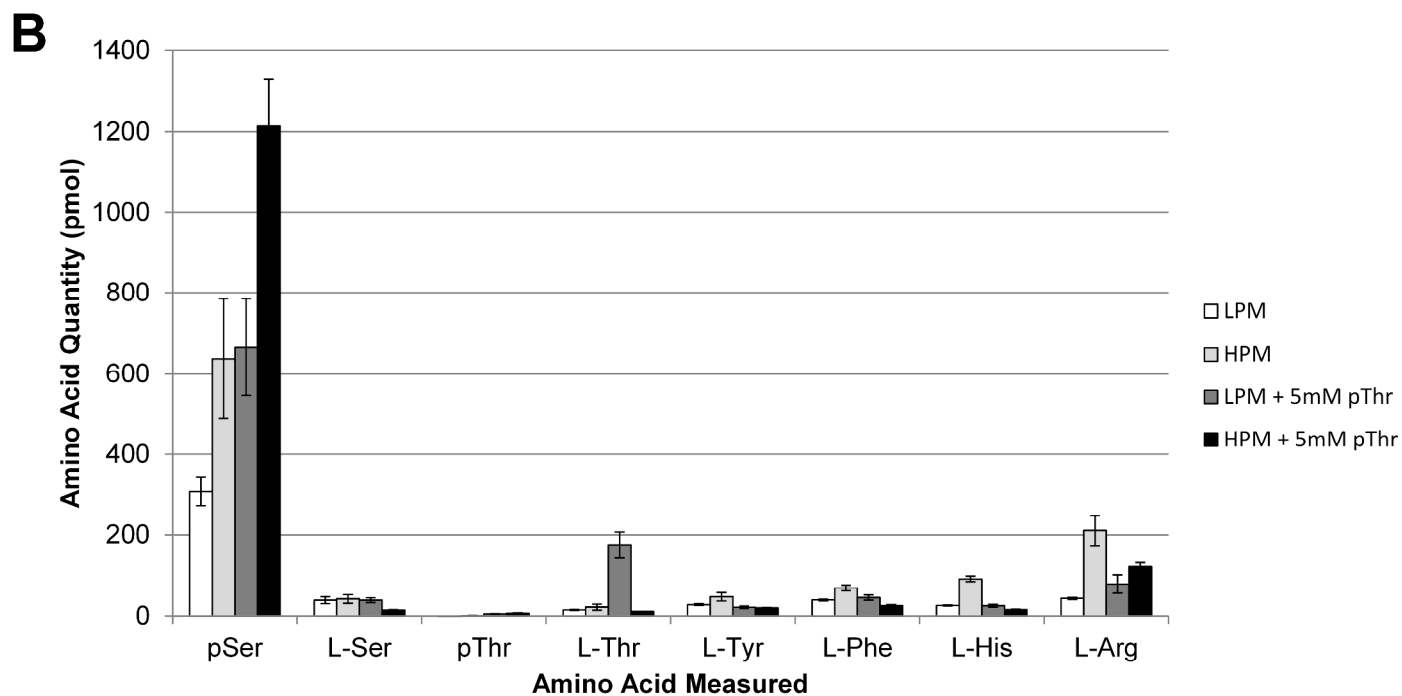

**Supplemental Figure 4. Dynamic levels of pSer in the cell extracts.**

**A)** Measured amino acid quantities of select amino acids in K12 BW25113  $\Delta serB$  *E. coli* grown in LPM media without (white) or with 5mM pSer (light grey), L-Ser (grey), and pSer/L-Ser (black). **B)** Measured amino acid quantities of select amino acids in K12 BW25113  $\Delta serB$  *E. coli* grown in LPM media (white), HPM media (light grey), in LPM media with 5mM pThr (grey), and HPM media with 5mM pThr (black). Error bars were calculated using the 95% confidence interval, n=5.

**Supplementary Table 1. Optimized Transitions for the Determination of Amino Acids by LC-MS/MS**

| Amino Acid | Retention Time (min) | Precursor Ion MS <sup>1</sup> | Product Ion MS <sup>2</sup> | Collision Energy (V) |
|------------|----------------------|-------------------------------|-----------------------------|----------------------|
| pSer       | 0.68                 | 186.02                        | 87.9*                       | 8                    |
| pSer       | 0.68                 | 186.02                        | 70.0                        | 16                   |
| pThr       | 0.74                 | 200.03                        | 102.1*                      | 4                    |
| pThr       | 0.74                 | 200.03                        | 56.0                        | 20                   |
| pTyr       | 0.92                 | 262.05                        | 216.0*                      | 4                    |
| pTyr       | 0.92                 | 262.05                        | 118.1                       | 20                   |
| pTyr       | 0.92                 | 262.05                        | 117.1                       | 48                   |
| pTyr       | 0.92                 | 262.05                        | 91.0                        | 44                   |
| L-Ser      | 1.30                 | 106.05                        | 60.0*                       | 4                    |
| L-Ser      | 1.30                 | 106.05                        | 42.0                        | 20                   |
| L-Ser      | 1.30                 | 106.05                        | 30.1                        | 20                   |
| L-Thr      | 1.70                 | 120.07                        | 74.0*                       | 4                    |
| L-Thr      | 1.70                 | 120.07                        | 56.2                        | 12                   |
| L-Thr      | 1.70                 | 120.07                        | 29.2                        | 28                   |
| L-Tyr      | 4.80                 | 182.08                        | 136.1                       | 8                    |
| L-Tyr      | 4.80                 | 182.08                        | 91.0*                       | 28                   |
| L-Tyr      | 4.80                 | 182.08                        | 76.9                        | 40                   |
| L-Tyr      | 4.80                 | 182.08                        | 51.0                        | 68                   |
| L-Phe      | 8.10                 | 166.09                        | 120.0*                      | 8                    |
| L-Phe      | 8.10                 | 166.09                        | 103.0                       | 28                   |
| L-Phe      | 8.10                 | 166.09                        | 76.9                        | 48                   |
| L-Phe      | 8.10                 | 166.09                        | 51.0                        | 60                   |
| L-His      | 11.43                | 156.08                        | 110.1*                      | 13                   |
| L-His      | 11.43                | 156.08                        | 82.9                        | 25                   |
| L-His      | 11.43                | 156.08                        | 56.1                        | 37                   |
| L-Lys      | 11.43                | 147.12                        | 130.3*                      | 8                    |
| L-Lys      | 11.43                | 147.12                        | 84.3                        | 0                    |
| L-Lys      | 11.43                | 147.12                        | 56.1                        | 28                   |
| L-Arg      | 11.77                | 175.12                        | 130.1                       | 12                   |
| L-Arg      | 11.77                | 175.12                        | 116.1                       | 12                   |
| L-Arg      | 11.77                | 175.12                        | 70.0*                       | 24                   |
| L-Arg      | 11.77                | 175.12                        | 60.0                        | 12                   |

\*Primary transition used for quantitation.

**Supplementary Table 2. Upper and Lower Limits of Detection for Measured Amino Acids**

|       | Lower Limit of Detection (pmol) | Upper Calibration Limit (pmol) |
|-------|---------------------------------|--------------------------------|
| pSer  | 0.5                             | 500                            |
| pThr  | 1                               | 500                            |
| pTyr  | 0.5                             | 500                            |
| L-Ser | 3                               | 500                            |
| L-Thr | 2                               | 500                            |
| L-Tyr | 0.5                             | 500                            |
| L-Phe | 0.5                             | 500                            |
| L-Lys | 5                               | 500                            |
| L-His | 3                               | 500                            |
| L-Arg | 1                               | 500                            |

**Supplementary Table 3. Table of Bacterial Strains.**

| Strain                                                     | Name                                 | Reference |
|------------------------------------------------------------|--------------------------------------|-----------|
| <i>E. coli</i> K12 BW25113                                 | WT (K12)                             | (1)       |
| <i>E. coli</i> K12 Keio Collection JW4351                  | $\Delta serB$ (K12 $\Delta serB$ )   | (1)       |
| <i>E. coli</i> BL-21 $\Delta serB$                         | $\Delta serB$ (BL-21 $\Delta serB$ ) | (2)       |
| <i>E. coli</i> Keio Collection (JW4064)                    | $\Delta phnE1$                       | (1)       |
| rEc7. $\Delta prfA$ . $\Delta tolC$ .bla:T7. $\Delta serB$ | EcAR7                                | (3)       |

# Supplementary Table 4. Final Dynamic MRM Method

Method Name 120801\_dMRM\_final5.m

Method Description This is 20 pmol/ul of amino acids in solvent A with 3 ul injection volume.  
This is dMRM with large windows for Y and Thr

Device List

µHiP ALS  
NanoPump  
CapPump  
MS QQQ

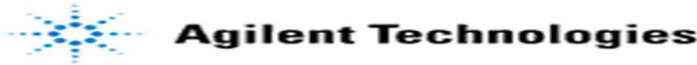

MS QQQ Mass Spectrometer

Ion Source AIS ESI      Tune File atunes.TUNE.XML  
Stop Mode No Limit/As Pump      Stop Time (min) 1  
Time Filter On      Time Filter Width (min) 0.07

Time Segments

| Index | Start Time (min) | Scan Type    | Ion Mode  | Div Valve | Delta EMV | Store | Cycle Time (ms) ? | Triggered | MRM Repeats |
|-------|------------------|--------------|-----------|-----------|-----------|-------|-------------------|-----------|-------------|
| 1     | 0.04             | Dyna micM RM | ESI+A Jet | To MS     | 350       | Yes   | 300               | No        | 0           |

Time Segment 1

| Cpd Name    | ISTD ? | Prec Ion | MS1 Res            | Prod Ion | MS2 Res            | Frag (V) | CE (V) | Cell Acc (V) | Ret Time | Ret Window | Polarity |
|-------------|--------|----------|--------------------|----------|--------------------|----------|--------|--------------|----------|------------|----------|
| F           | No     | 166.09   | Wide / Unit (6490) | 120      | Wide / Unit (6490) | 380      | 8      | 5            | 8.1      | 2.46       | Positive |
| F           | No     | 166.09   | Wide / Unit (6490) | 103      | Wide / Unit (6490) | 380      | 28     | 5            | 8.1      | 2.46       | Positive |
| F           | No     | 166.09   | Wide / Unit (6490) | 76.9     | Wide / Unit (6490) | 380      | 48     | 5            | 8.1      | 2.46       | Positive |
| F           | No     | 166.09   | Wide / Unit (6490) | 51       | Wide / Unit (6490) | 380      | 60     | 5            | 8.1      | 2.46       | Positive |
| H           | No     | 156.08   | Wide / Unit (6490) | 110.1    | Wide / Unit (6490) | 380      | 13     | 5            | 11.43    | 1.62       | Positive |
| H           | No     | 156.08   | Wide / Unit (6490) | 82.9     | Wide / Unit (6490) | 380      | 25     | 5            | 11.43    | 1.62       | Positive |
| H           | No     | 156.08   | Wide / Unit (6490) | 56.1     | Wide / Unit (6490) | 380      | 37     | 5            | 11.43    | 1.62       | Positive |
| K           | No     | 147.12   | Wide / Unit (6490) | 130.3    | Wide / Unit (6490) | 380      | 8      | 5            | 11.43    | 1.4        | Positive |
| K           | No     | 147.12   | Wide / Unit (6490) | 84.3     | Wide / Unit (6490) | 380      | 0      | 5            | 11.43    | 1.4        | Positive |
| K           | No     | 147.12   | Wide / Unit (6490) | 56.1     | Wide / Unit (6490) | 380      | 28     | 5            | 11.43    | 1.4        | Positive |
| L-Serine    | No     | 106.05   | Wide / Unit (6490) | 60       | Wide / Unit (6490) | 380      | 4      | 5            | 1.3      | 2          | Positive |
| L-Serine    | No     | 106.05   | Wide / Unit (6490) | 42       | Wide / Unit (6490) | 380      | 20     | 5            | 1.3      | 2          | Positive |
| L-Serine    | No     | 106.05   | Wide / Unit (6490) | 30.1     | Wide / Unit (6490) | 380      | 20     | 5            | 1.3      | 2          | Positive |
| L-Threonine | No     | 120.07   | Wide / Unit (6490) | 74       | Wide / Unit (6490) | 380      | 4      | 5            | 1.7      | 2          | Positive |
| L-Threonine | No     | 120.07   | Wide / Unit (6490) | 56.2     | Wide / Unit (6490) | 380      | 12     | 5            | 1.7      | 2          | Positive |
| L-Threonine | No     | 120.07   | Wide / Unit (6490) | 29.2     | Wide / Unit (6490) | 380      | 28     | 5            | 1.7      | 2          | Positive |
| L-Tyrosine  | No     | 182.08   | Wide / Unit (6490) | 136.1    | Wide / Unit (6490) | 380      | 8      | 5            | 4.8      | 2          | Positive |
| L-Tyrosine  | No     | 182.08   | Wide / Unit (6490) | 91       | Wide / Unit (6490) | 380      | 28     | 5            | 4.8      | 2          | Positive |
| L-Tyrosine  | No     | 182.08   | Wide / Unit (6490) | 76.9     | Wide / Unit (6490) | 380      | 40     | 5            | 4.8      | 2          | Positive |
| L-Tyrosine  | No     | 182.08   | Wide / Unit (6490) | 51       | Wide / Unit (6490) | 380      | 68     | 5            | 4.8      | 2          | Positive |
| pSer        | No     | 186.02   | Wide / Unit (6490) | 87.9     | Wide / Unit (6490) | 380      | 8      | 5            | 0.68     | 2.5        | Positive |
| pSer        | No     | 186.02   | Wide / Unit (6490) | 70       | Wide / Unit (6490) | 380      | 16     | 5            | 0.68     | 2.5        | Positive |
| pThr        | No     | 200.03   | Wide / Unit (6490) | 102.1    | Wide / Unit (6490) | 380      | 4      | 5            | 0.74     | 2          | Positive |
| pThr        | No     | 200.03   | Wide / Unit (6490) | 56       | Wide / Unit (6490) | 380      | 20     | 5            | 0.74     | 2          | Positive |
| pTyr        | No     | 262.05   | Wide / Unit (6490) | 216      | Wide / Unit (6490) | 380      | 4      | 5            | 0.92     | 2          | Positive |
| pTyr        | No     | 262.05   | Wide / Unit (6490) | 118.1    | Wide / Unit (6490) | 380      | 20     | 5            | 0.92     | 2          | Positive |
| pTyr        | No     | 262.05   | Wide / Unit (6490) | 117.1    | Wide / Unit (6490) | 380      | 48     | 5            | 0.92     | 2          | Positive |
| pTyr        | No     | 262.05   | Wide / Unit (6490) | 91       | Wide / Unit (6490) | 380      | 44     | 5            | 0.92     | 2          | Positive |
| R           | No     | 175.12   | Wide / Unit (6490) | 130.1    | Wide / Unit (6490) | 380      | 12     | 5            | 11.77    | 2          | Positive |
| R           | No     | 175.12   | Wide / Unit (6490) | 116.1    | Wide / Unit (6490) | 380      | 12     | 5            | 11.77    | 2          | Positive |
| R           | No     | 175.12   | Wide / Unit (6490) | 70       | Wide / Unit (6490) | 380      | 24     | 5            | 11.77    | 2          | Positive |
| R           | No     | 175.12   | Wide / Unit (6490) | 60       | Wide / Unit (6490) | 380      | 12     | 5            | 11.77    | 2          | Positive |



## Supplementary Table 4 (continued). Final Dynamic MRM Method

### Source Parameters

| Parameter        | Value (+) | Value (-) |
|------------------|-----------|-----------|
| Gas Temp (°C)    | 350       | 350       |
| Gas Flow (l/min) | 11        | 11        |
| Nebulizer (psi)  | 23        | 23        |
| SheathGasHeater  | 150       | 150       |
| SheathGasFlow    | 12        | 12        |
| Capillary (V)    | 2500      | 3000      |
| VCharging        | 500       | 1500      |

### Chromatograms

| Chrom Type | Label | Offset | Y-Range |
|------------|-------|--------|---------|
| MRM        | MRM   | 10     | 10000   |

### Instrument Curves

#### Capillary Pump

|                         |                                               |                            |             |
|-------------------------|-----------------------------------------------|----------------------------|-------------|
| Name                    | CapPump                                       | Model                      | G1376A      |
| Ordinal #               | 1                                             | Options                    | SSV_FS1_FCC |
| Stop Time (min)         | 30                                            | Post Time (min)            | Off         |
| Mode                    | Normal Flow                                   | Flow (µl/min)              | 200         |
| Pressure Min (bar)      | 0                                             | Pressure Max (bar)         | 400         |
| Fast Reconditioning     | Off                                           | Max Flow Gradient (ml/min) | 100         |
| Primary Flow (µl/min)   | 500                                           | Column Flow Ready          | N/A         |
| Calibrated As           | Uncalibrated(H2O-H2O)                         |                            |             |
| Solvent A               | 99.5 % Water, 0.5 % ACN, 0.1 % FA, 0.1 % PFOA |                            |             |
| Solvent Ratio A         | 100                                           |                            |             |
| Compress. A (*10-6/bar) | 100                                           |                            |             |
| Solvent B               | 90 % ACN 0.1 FA, 0.1 % PFOA                   |                            |             |
| Solvent Ratio B         | 0                                             |                            |             |
| Compress. B (*10-6/bar) | 115                                           |                            |             |
| Stroke B (µl)           | Auto                                          |                            |             |
| Stroke A (µl)           | Auto                                          |                            |             |
| Contact 1               | Off                                           |                            |             |
| Contact 2               | Off                                           |                            |             |
| Contact 3               | Off                                           |                            |             |
| Contact 4               | Off                                           |                            |             |

#### Pump Time Table

| Time | Flow | Pressure | SolvRatioB |
|------|------|----------|------------|
| 0    | 200  | 400      | 0          |
| 2    | 200  | 400      | 0          |
| 3    | 200  | 400      | 30         |
| 15   | 200  | 400      | 62         |
| 15.5 | 300  | 400      | 100        |
| 21.5 | 350  | 400      | 100        |
| 22.5 | 200  | 400      | 0          |

### Signals Selected

#### Description

Pressure

Solvent% B

## Supplementary Table 4 (continued). Final Dynamic MRM Method

### Micro Wellplate Sampler

|                                         |                       |                                 |           |
|-----------------------------------------|-----------------------|---------------------------------|-----------|
| <b>Name</b>                             | µHiP ALS              | <b>Model</b>                    | G1377A    |
| <b>Ordinal #</b>                        | 1                     | <b>Options</b>                  | THM       |
| <b>Stop Time (min)</b>                  | No Limit              | <b>Post Time (min)</b>          | Off       |
| <b>Injection Type</b>                   | Needle Wash           | <b>Injection Volume (µl)</b>    | 3         |
| <b>Overlap Time (min)</b>               | Disable<br>Overlapped | <b>Draw Position (mm)</b>       | 1         |
| <b>Vial/Well bottom sensing</b>         | Yes                   | <b>Draw Speed (µl/min)</b>      | 20        |
| <b>Eject Speed (µl/min)</b>             | 100                   | <b>Flush Out Factor</b>         | 5         |
| <b>Automatic Delay Volume Reduction</b> | No                    | <b>Equilibration Time (sec)</b> | 0         |
| <b>Wash Vessel</b>                      | N/A                   | <b>Wash Location</b>            | FlushPort |
| <b>Wash Time</b>                        | 10                    | <b>Wash Cycles</b>              | N/A       |
| <b>Contact 1</b>                        | Off                   |                                 |           |
| <b>Contact 2</b>                        | Off                   |                                 |           |
| <b>Contact 3</b>                        | Off                   |                                 |           |
| <b>Contact 4</b>                        | Off                   |                                 |           |

|                                |                       |                                 |             |
|--------------------------------|-----------------------|---------------------------------|-------------|
| <b>Nano Pump</b>               | <b>Model</b>          | G2226A                          |             |
| <b>Name</b>                    | NanoPump              | <b>Options</b>                  | SSV_FS3_FCC |
| <b>Ordinal #</b>               | 1                     |                                 |             |
| <b>Stop Time (min)</b>         | No Limit              | <b>Post Time (min)</b>          | Off         |
| <b>Mode</b>                    | Normal Flow           | <b>Flow (µl/min)</b>            | 3           |
| <b>Pressure Min (bar)</b>      | 0                     | <b>Pressure Max (bar)</b>       | 400         |
| <b>Fast Reconditioning</b>     | Off                   | <b>Max Flow Gradient (ml/n)</b> | 100         |
| <b>Primary Flow (µl/min)</b>   | 500                   | <b>Column Flow Ready</b>        | N/A         |
| <b>Calibrated As</b>           | Uncalibrated(H2O-H2O) |                                 |             |
| <b>Solvent A</b>               |                       | <b>Solvent B</b>                |             |
| <b>Solvent Ratio A</b>         | 100                   | <b>Solvent Ratio B</b>          | 0           |
| <b>Compress. A (*10-6/bar)</b> | 100                   | <b>Compress. B (*10-6/bar)</b>  | 115         |
| <b>Stroke A (µl)</b>           | Auto                  |                                 |             |
| <b>Contact 1</b>               | Off                   |                                 |             |
| <b>Contact 2</b>               | Off                   |                                 |             |
| <b>Contact 3</b>               | Off                   |                                 |             |
| <b>Contact 4</b>               | Off                   |                                 |             |

**Supplementary Table 5. Table of Amino Acid Measurements**

| Figure  | Strain (media)              | pSer   | Error | pThr | Error | pTyr | Error | Ser   | Error | Thr   | Error | Tyr    | Error | Phe   | Error | Lys   | Error | His   | Error | Arg   | Error |
|---------|-----------------------------|--------|-------|------|-------|------|-------|-------|-------|-------|-------|--------|-------|-------|-------|-------|-------|-------|-------|-------|-------|
| Fig. 2A | K-12 LPM                    | LOQ    | nd    | LOQ  | nd    | LOQ  | nd    | 60.2  | 36.0  | 14.1  | 2.6   | 35.2   | 3.7   | 64.8  | 10.8  | 114.3 | 34.1  | 40.0  | 6.4   | 37.6  | 12.5  |
| Fig. 2A | K-12 LB                     | LOQ    | nd    | LOQ  | nd    | LOQ  | nd    | 12.8  | 4.9   | 6.6   | 0.8   | 149.8  | 12.6  | 292.5 | 23.0  | 315.4 | 29.7  | 93.4  | 13.8  | 162.8 | 16.8  |
| Fig. 2B | K-12 LPM                    | LOQ    | nd    | LOQ  | 0.0   | LOQ  | nd    | 60.2  | 36.0  | 14.1  | 2.6   | 35.2   | 3.7   | 64.8  | 10.8  | 114.3 | 34.1  | 40.0  | 6.4   | 37.6  | 12.5  |
| Fig. 2B | K-12 LPM 5mM pSer           | LOQ    | nd    | 1.3  | 0.1   | LOQ  | nd    | 269.2 | 40.3  | 127.0 | 15.3  | 52.5   | 11.1  | 103.8 | 10.2  | 329.7 | 44.8  | 107.7 | 11.9  | 68.3  | 17.2  |
| Fig. 2B | K-12 LPM 5mM pThr           | LOQ    | nd    | 4.3  | 0.9   | LOQ  | nd    | 146.5 | 50.1  | 195.1 | 31.2  | 81.8   | 9.9   | 137.2 | 18.8  | 462.9 | 39.1  | 117.1 | 17.3  | 47.1  | 8.1   |
| Fig. 2B | K-12 LPM 5mM pTyr           | LOQ    | nd    | LOQ  | nd    | 20.8 | 3.6   | 130.5 | 70.7  | 137.0 | 34.0  | 148.2  | 16.2  | 95.0  | 16.4  | 360.3 | 33.5  | 97.0  | 10.6  | 42.5  | 10.7  |
| Fig. 2B | K-12 LB                     | LOQ    | nd    | 7.6  | 1.1   | LOQ  | nd    | 12.8  | 4.9   | 6.6   | 0.8   | 149.8  | 12.6  | 292.5 | 23.0  | 315.4 | 29.7  | 93.4  | 13.8  | 162.8 | 16.8  |
| Fig. 2B | K-12 LB 5mM pSer            | 2.5    | 1.3   | 8.1  | 3.4   | LOQ  | nd    | 10.1  | 3.2   | 7.4   | 1.5   | 125.3  | 43.0  | 230.6 | 20.3  | 121.1 | 32.5  | 70.2  | 6.0   | 61.1  | 19.3  |
| Fig. 2B | K-12 LB 5mM pThr            | LOQ    | nd    | 11.4 | 1.2   | LOQ  | nd    | 14.1  | 6.4   | 8.1   | 2.5   | 131.5  | 76.8  | 240.8 | 48.3  | 172.1 | 38.3  | 80.1  | 21.1  | 86.8  | 23.6  |
| Fig. 2B | K-12 LB 5mM pTyr            | LOQ    | nd    | 6.3  | 2.1   | LOQ  | nd    | 8.4   | 3.4   | 5.5   | 1.6   | 1016.7 | 471.5 | 181.7 | 47.9  | 152.5 | 35.3  | 90.3  | 20.7  | 86.3  | 28.2  |
| Fig. 3A | K-12 LPM                    | LOQ    | nd    | LOQ  | nd    | LOQ  | nd    | 60.2  | 36.0  | 14.1  | 2.6   | 35.2   | 3.7   | 64.8  | 10.8  | 114.3 | 34.1  | 40.0  | 6.4   | 37.6  | 12.5  |
| Fig. 3A | K-12 LB                     | LOQ    | nd    | 7.6  | 1.1   | LOQ  | nd    | 12.8  | 4.9   | 6.6   | 0.8   | 149.8  | 12.6  | 292.5 | 23.0  | 315.4 | 29.7  | 93.4  | 13.8  | 162.8 | 16.8  |
| Fig. 3A | K-12 ΔserB LPM              | 308.3  | 35.3  | LOQ  | nd    | LOQ  | nd    | 39.3  | 8.6   | 15.1  | 1.4   | 28.7   | 2.2   | 39.9  | 2.5   | 115.0 | 7.6   | 26.5  | 1.3   | 44.0  | 2.4   |
| Fig. 3A | K-12 ΔserB LB               | 7.6    | 0.8   | 5.8  | 1.0   | LOQ  | nd    | 9.4   | 2.7   | 3.9   | 0.9   | 87.1   | 19.4  | 190.6 | 24.8  | 248.9 | 24.7  | 58.1  | 6.4   | 143.0 | 26.8  |
| Fig. 3B | K-12 ΔserB LPM              | 308.3  | 35.3  | LOQ  | nd    | LOQ  | nd    | 39.3  | 8.6   | 15.1  | 1.4   | 28.7   | 2.2   | 39.9  | 2.5   | 115.0 | 7.6   | 26.5  | 1.3   | 44.0  | 2.4   |
| Fig. 3B | K-12 ΔserB LPM 5mM pSer     | 212.7  | 3.9   | LOQ  | nd    | LOQ  | nd    | 65.1  | 8.3   | 14.3  | 0.7   | 24.7   | 1.9   | 39.3  | 3.9   | 124.6 | 37.3  | 20.8  | 6.2   | 46.3  | 23.3  |
| Fig. 3B | K-12 ΔserB LPM 5mM pThr     | 665.8  | 119.2 | 5.4  | 0.7   | LOQ  | nd    | 39.7  | 5.9   | 175.7 | 31.4  | 22.0   | 3.2   | 46.2  | 6.7   | 165.7 | 29.3  | 25.6  | 3.7   | 80.3  | 22.9  |
| Fig. 3B | K-12 ΔserB LPM 5mM pTyr     | 462.5  | 53.4  | LOQ  | nd    | 82.6 | 8.9   | 21.5  | 4.1   | 16.3  | 1.7   | 41.9   | 5.5   | 25.6  | 4.5   | 109.4 | 21.5  | 15.6  | 1.9   | 57.7  | 20.7  |
| Fig. 3B | K-12 ΔserB LB               | 7.6    | 0.8   | 5.8  | 1.0   | LOQ  | nd    | 9.4   | 2.7   | 3.9   | 0.9   | 87.1   | 19.4  | 190.6 | 24.8  | 248.9 | 24.7  | 58.1  | 6.4   | 143.0 | 26.8  |
| Fig. 3B | K-12 ΔserB LB 5mM pSer      | 12.2   | 1.5   | 7.2  | 1.5   | LOQ  | nd    | 11.9  | 4.3   | 5.1   | 0.9   | 70.2   | 4.4   | 161.2 | 11.1  | 130.5 | 18.6  | 63.9  | 7.3   | 59.3  | 5.9   |
| Fig. 3B | K-12 ΔserB LB 5mM pThr      | 9.2    | 1.1   | 10.8 | 1.0   | LOQ  | nd    | 10.1  | 3.1   | 6.0   | 0.5   | 86.8   | 18.9  | 186.3 | 9.3   | 152.2 | 21.8  | 71.3  | 7.3   | 66.4  | 12.9  |
| Fig. 3B | K-12 ΔserB LB 5mM pTyr      | 7.8    | 1.8   | 8.3  | 2.4   | LOQ  | nd    | 13.5  | 4.8   | 6.2   | 1.4   | 910.8  | 177.3 | 185.8 | 35.0  | 138.4 | 22.2  | 88.4  | 16.6  | 68.4  | 5.0   |
| Fig. 4A | K-12 WT LPM                 | LOQ    | nd    | LOQ  | nd    | LOQ  | nd    | 60.2  | 36.0  | 14.1  | 2.6   | 35.2   | 3.7   | 64.8  | 10.8  | 114.3 | 34.1  | 40.0  | 6.4   | 37.6  | 12.5  |
| Fig. 4A | K-12 WT LB                  | LOQ    | nd    | 7.6  | 1.1   | LOQ  | nd    | 12.8  | 4.9   | 6.6   | 0.8   | 149.8  | 12.6  | 292.5 | 23.0  | 315.4 | 29.7  | 93.4  | 13.8  | 162.8 | 16.8  |
| Fig. 4A | K-12 ΔserB LPM              | 308.3  | 35.3  | LOQ  | nd    | LOQ  | nd    | 39.3  | 8.6   | 15.1  | 1.4   | 28.7   | 2.2   | 39.9  | 2.5   | 115.0 | 7.6   | 26.5  | 1.3   | 44.0  | 2.4   |
| Fig. 4A | K-12 ΔserB LB               | 7.6    | 0.8   | 5.8  | 1.0   | LOQ  | nd    | 9.4   | 2.7   | 3.9   | 0.9   | 87.1   | 19.4  | 190.6 | 24.8  | 248.9 | 24.7  | 58.1  | 6.4   | 143.0 | 26.8  |
| Fig. 4A | K-12 ΔserB LPM              | 308.3  | 35.3  | LOQ  | nd    | LOQ  | nd    | 39.3  | 8.6   | 15.1  | 1.4   | 28.7   | 2.2   | 39.9  | 2.5   | 115.0 | 7.6   | 26.5  | 1.3   | 44.0  | 2.4   |
| Fig. 4A | K-12 ΔserB LPM 5mM pSer     | 212.7  | 3.9   | LOQ  | nd    | LOQ  | nd    | 65.1  | 8.3   | 14.3  | 0.7   | 24.7   | 1.9   | 39.3  | 3.9   | 124.6 | 37.3  | 20.8  | 6.2   | 46.3  | 23.3  |
| Fig. 4A | K-12 ΔserB LPM 5mM Ser      | 33.0   | 13.8  | LOQ  | nd    | LOQ  | nd    | 117.2 | 23.8  | 33.2  | 11.9  | 35.5   | 4.1   | 83.9  | 9.2   | 170.5 | 43.2  | 49.4  | 12.3  | 20.6  | 1.9   |
| Fig. 4A | K-12 ΔserB LPM 5mM Ser&pSer | 3.4    | 0.8   | LOQ  | nd    | LOQ  | nd    | 106.4 | 21.5  | 42.0  | 4.2   | 30.5   | 1.8   | 59.5  | 3.4   | 216.1 | 25.9  | 49.7  | 9.3   | 35.4  | 3.9   |
| Fig. 4A | K-12 ΔserB LPM              | 308.3  | 35.3  | LOQ  | nd    | LOQ  | nd    | 39.3  | 8.6   | 15.1  | 1.4   | 28.7   | 2.2   | 39.9  | 2.5   | 115.0 | 7.6   | 26.5  | 1.3   | 44.0  | 2.4   |
| Fig. 4A | K-12 ΔserB HPM              | 637.6  | 147.5 | 0.9  | 0.4   | LOQ  | nd    | 42.6  | 10.7  | 22.2  | 7.6   | 48.0   | 10.6  | 70.3  | 7.1   | 529.0 | 78.6  | 93.0  | 6.8   | 210.7 | 37.1  |
| Fig. 4A | K-12 ΔserB LPM 5mM pThr     | 665.8  | 119.2 | 5.4  | 0.7   | LOQ  | nd    | 39.7  | 5.9   | 175.7 | 31.4  | 22.0   | 3.2   | 46.2  | 6.7   | 165.7 | 29.3  | 25.6  | 3.7   | 80.3  | 22.9  |
| Fig. 4A | K-12 ΔserB HPM 5mM pThr     | 1213.6 | 115.9 | 6.9  | 0.9   | LOQ  | nd    | 14.6  | 1.0   | 11.1  | 1.1   | 20.4   | 1.0   | 26.0  | 2.2   | 125.3 | 3.3   | 16.0  | 1.4   | 123.9 | 9.7   |
|         | BL-21 ΔserB LB              | 11.6   | 1.4   | 3.0  | 0.6   | LOQ  | nd    | 10.4  | 2.7   | 8.0   | 0.7   | 108.7  | 3.3   | 236.4 | 29.8  | 497.8 | 48.3  | 94.2  | 14.1  | 14.7  | 3.7   |
|         | BL-21 ΔserB LB 5mM pSer     | 16.8   | 1.6   | 7.1  | 0.9   | LOQ  | nd    | 10.2  | 4.7   | 8.5   | 1.1   | 67.9   | 3.4   | 177.7 | 17.7  | 380.3 | 13.9  | 92.8  | 5.3   | 5.8   | 0.5   |
|         | BL-21 ΔserB LB 5mM pThr     | 16.8   | 2.5   | 7.0  | 1.9   | LOQ  | nd    | 8.9   | 1.5   | 9.1   | 1.2   | 83.1   | 23.8  | 184.4 | 10.8  | 443.5 | 65.5  | 114.3 | 14.1  | 5.8   | 0.9   |
|         | BL-21 ΔserB LB 5mM pTyr     | 15.2   | 2.2   | 4.6  | 1.9   | 4.3  | 2.2   | 7.7   | 1.1   | 8.5   | 0.7   | 246.2  | 17.3  | 169.8 | 15.0  | 398.5 | 19.9  | 98.6  | 6.6   | 7.0   | 1.8   |
|         | BL-21 ΔserB LPM             | 25.4   | 5.1   | LOQ  | nd    | LOQ  | nd    | 23.8  | 2.8   | 11.4  | 1.8   | 66.8   | 6.2   | 162.7 | 19.1  | 240.2 | 13.6  | 29.1  | 5.0   | 23.3  | 5.5   |
|         | BL-21 ΔserB LPM 5mM pSer    | 2.5    | 0.2   | LOQ  | nd    | LOQ  | nd    | 114.7 | 19.5  | 10.9  | 1.2   | 95.4   | 10.3  | 220.6 | 25.1  | 396.1 | 59.8  | 28.6  | 4.1   | 42.0  | 9.6   |
|         | BL-21 ΔserB LPM 5mM pThr    | 24.2   | 4.9   | 2.6  | 0.3   | LOQ  | nd    | 22.5  | 5.9   | 10.5  | 2.5   | 79.5   | 10.0  | 192.7 | 18.7  | 396.6 | 76.6  | 27.1  | 6.5   | 48.6  | 22.8  |
|         | BL-21 ΔserB LPM 5mM pTyr    | 24.5   | 3.4   | LOQ  | nd    | 30.5 | 6.87  | 22.9  | 4.4   | 12.6  | 1.7   | 199.3  | 20.4  | 120.5 | 18.5  | 433.5 | 46.0  | 32.1  | 4.7   | 22.4  | 2.2   |
|         | K-12 ΔserB LB               | 7.6    | 0.8   | 5.8  | 1.0   | LOQ  | 0     | 9.4   | 2.7   | 3.9   | 0.9   | 87.1   | 19.4  | 190.6 | 24.8  | 248.9 | 24.7  | 58.1  | 6.4   | 143.0 | 26.8  |
|         | K-12 ΔserB LB 5mM pSer      | 12.2   | 1.47  | 7.2  | 1.5   | LOQ  | 0     | 11.9  | 4.3   | 5.1   | 0.9   | 70.2   | 4.4   | 161.2 | 11.1  | 130.5 | 18.6  | 63.9  | 7.3   | 59.3  | 5.9   |
|         | K-12 ΔserB LB 5mM pThr      | 9.2    | 1.1   | 10.8 | 1.0   | LOQ  | nd    | 10.1  | 3.1   | 6.0   | 0.5   | 86.8   | 18.9  | 186.3 | 9.3   | 152.2 | 21.8  | 71.3  | 7.3   | 66.4  | 12.9  |
|         | K-12 ΔserB LB 5mM pTyr      | 7.8    | 1.8   | 8.3  | 2.4   | LOQ  | nd    | 13.5  | 4.8   | 6.2   | 1.4   | 910.8  | 177.3 | 185.8 | 35.0  | 138.4 | 22.2  | 88.4  | 16.6  | 68.4  | 5.0   |
|         | K-12 ΔserB LPM              | 308.3  | 35.3  | LOQ  | 0     | LOQ  | 0     | 39.3  | 8.6   | 15.1  | 1.4   | 28.7   | 2.2   | 39.9  | 2.5   | 115.0 | 7.6   | 26.5  | 1.3   | 44.0  | 2.4   |
|         | K-12 ΔserB LPM 5mM pSer     | 212.7  | 3.9   | LOQ  | nd    | LOQ  | nd    | 65.1  | 8.3   | 14.3  | 0.7   | 24.7   | 1.9   | 39.3  | 3.9   | 124.6 | 37.3  | 20.8  | 6.2   | 46.3  | 23.3  |
|         | K-12 ΔserB LPM 5mM pThr     | 665.8  | 119.2 | 5.4  | 0.7   | LOQ  | nd    | 39.7  | 5.9   | 175.7 | 31.4  | 22.0   | 3.2   | 46.2  | 6.7   | 165.7 | 29.3  | 25.6  | 3.7   | 80.3  | 22.9  |
|         | K-12 ΔserB LPM 5mM pTyr     | 462.5  | 53.4  | LOQ  | nd    | 82.6 | 8.9   | 21.5  | 4.1   | 16.3  | 1.7   | 41.9   | 5.5   | 25.6  | 4.5   | 109.4 | 21.5  | 15.6  | 1.9   | 57.7  | 20.7  |

Errors were calculated using the 95% confidence interval, n=5; LOQ=below limit of quantitation; nd=no data

## Supplementary References

1. Baba, T., Ara, T., Hasegawa, M., Takai, Y., Okumura, Y., Baba, M., Datsenko, K. A., Tomita, M., Wanner, B. L., and Mori, H. (2006) Construction of *Escherichia coli* K-12 in-frame, single-gene knockout mutants: the Keio collection, *Mol. Syst. Biol.* 2.
2. Park, H. S., Hohn, M. J., Umehara, T., Guo, L. T., Osborne, E. M., Benner, J., Noren, C. J., Rinehart, J., and Söll, D. (2011) Expanding the genetic code of *Escherichia coli* with phosphoserine, *Science* 333, 1151-1154.
3. Heinemann, I. U., Rovner, A. J., Aerni, H. R., Rogulina, S., Cheng, L., Olds, W., Fischer, J. T., Soll, D., Isaacs, F. J., and Rinehart, J. (2012) Enhanced phosphoserine insertion during *Escherichia coli* protein synthesis via partial UAG codon reassignment and release factor 1 deletion, *FEBS Lett.* 586, 3716-3722.
